# Supplementary material
Source: PubMed Central journal article supplement (PMC1892907)

## Supplemental Material:

Figure S1. Histological analysis of mid-term (21 day) fetuses derived from in vivo fertilization (control) and SCNT with fibroblasts as the nuclear donor. Two independent examples of 21 day clones are shown (NT-1 and NT-2). Whole mount photomicrographs are shown for each embryo in the left hand panel, followed by histologic sections to the right. (A) mandibular component of branchial arch; (B) heart; (C) lung bud; (D) hepatic primordium; (E) lumen of duodenum; (F) centrum of axis; (G) dorsal root ganglion; (H) third ventricle.

Table S1. Microsatellite genotyping of ferret DNA

| Ferrets<br>and cells | Microsatellite DNA Markers |       |         |         |         |       |         |         |         |         |         |
|----------------------|----------------------------|-------|---------|---------|---------|-------|---------|---------|---------|---------|---------|
|                      | Mer022                     | Mvi87 | G1A     | Mvis072 | Mvi232  | Gg4   | Mvis022 | Mer095  | Mvi57   | Mvis075 | Mer049  |
| FCC1                 | 245/245                    | 78/78 | 162/162 | 269/271 | 155/155 | ND    | 284/284 | 152/152 | 104/106 | 139/139 | 185/185 |
| AL01                 | 245/245                    | 78/78 | 162/162 | 269/271 | 155/159 | 90/90 | 284/284 | 148/148 | 104/106 | 139/139 | 185/185 |
| AL02                 | 245/245                    | 76/78 | 160/162 | 269/269 | 153/155 | 90/90 | 284/286 | 150/150 | 104/106 | 139/139 | 185/185 |
| SA01                 | 245/245                    | 78/78 | 160/162 | 271/271 | 155/159 | 90/90 | 284/284 | 150/150 | 106/106 | 139/139 | 185/185 |
| SA02                 | 245/245                    | 76/78 | 160/162 | 269/271 | 153/155 | 90/90 | 286/286 | 150/150 | 104/106 | 139/139 | 183/185 |
| SA03                 | 245/245                    | 76/78 | 158/160 | 271/271 | 155/155 | ND    | 284/284 | 152/152 | 104/106 | 139/139 | 183/185 |
| SA04                 | 245/245                    | 87/89 | 160/162 | 269/271 | 153/155 | ND    | 284/284 | 152/152 | 104/106 | 139/139 | 183/185 |
| SA05                 | 245/245                    | 76/78 | 160/162 | 267/269 | 153/155 | ND    | 284/286 | 152/152 | 104/106 | 139/139 | 183/183 |
| SA06                 | 245/245                    | 76/78 | 160/162 | 271/271 | 151/153 | ND    | 284/284 | 152/152 | 104/106 | 139/139 | 183/185 |
| SA07                 | 245/245                    | 76/78 | 160/162 | 267/269 | 153/155 | 90/90 | 284/286 | 152/152 | 104/106 | 139/139 | 183/185 |
| SA08                 | 245/245                    | 78/78 | 160/160 | 269/269 | 153/155 | 90/90 | 284/284 | 152/152 | 106/108 | 139/139 | 185/185 |
| SA09                 | 245/245                    | 78/78 | 162/162 | 269/269 | 153/153 | 90/90 | 286/286 | 152/152 | 106/108 | 139/139 | 183/185 |
| SA10                 | 245/245                    | 78/78 | 162/162 | 269/269 | 155/155 | 90/90 | 284/284 | ND      | 106/106 | 139/139 | 185/185 |

AL01-AL02: unrelated albino fibroblasts; SA01-SA10: unrelated sable fibroblasts; ND: Not determined; FCC1: Ferret cumulus cells unrelated to cloned animals.

Whole Mount

Section  
Plane 1Section  
Plane 2

Organs

Control  
21 Day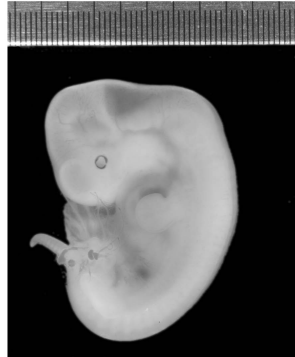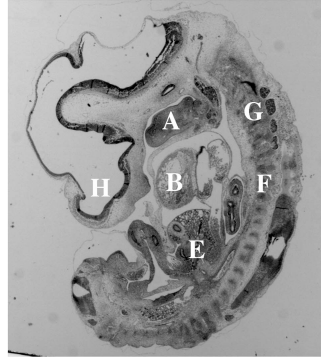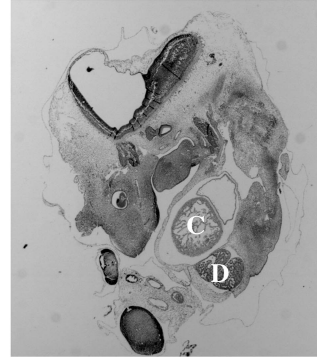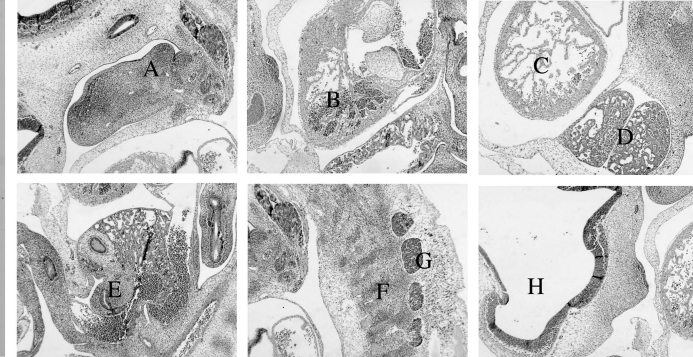NT-1  
21 Day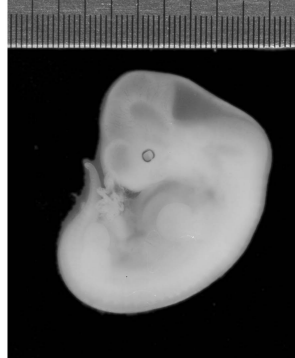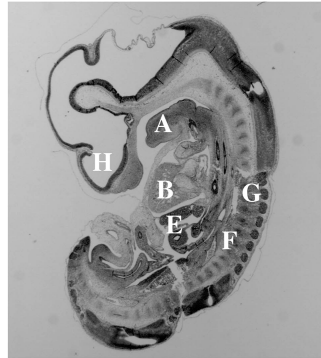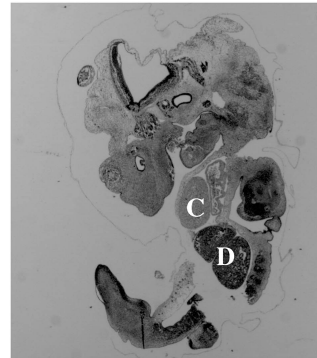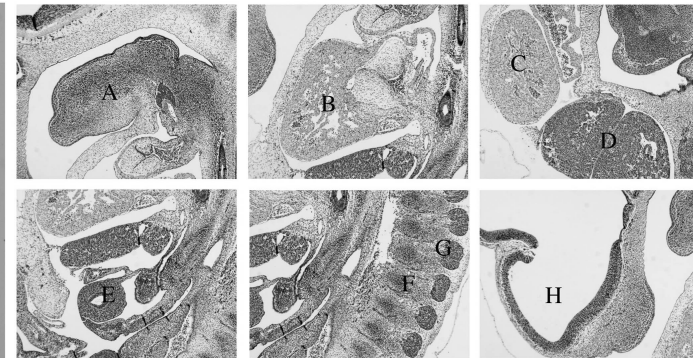NT-2  
21 Day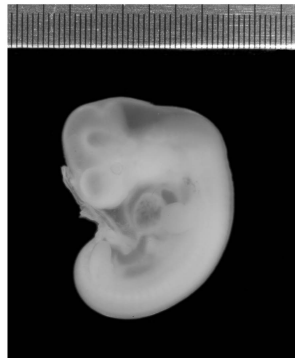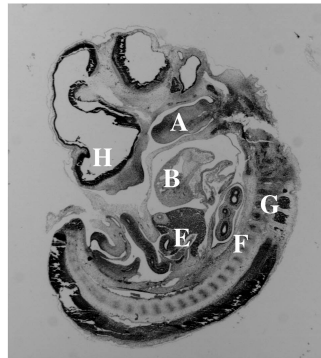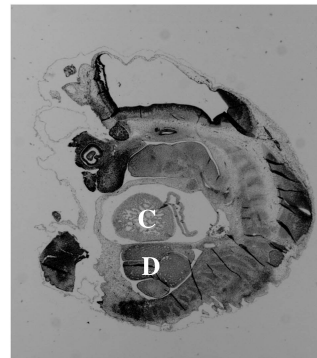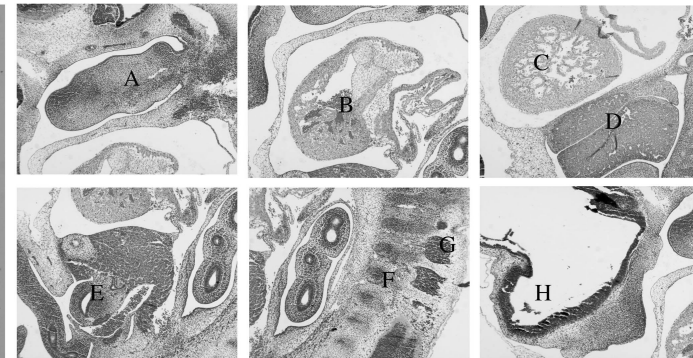

Supplement: NIHMS21507-supplement-Supp.pdf [file NIHMS21507-supplement-Supp.pdf]
